# Supplementary material for: Hospital Drains as Reservoirs of Pseudomonas aeruginosa: Multiple-Locus Variable-Number of Tandem Repeats Analysis Genotypes Recovered from Faucets, Sink Surfaces and Patients
Source: PubMed Central journal article supplement (PMC5617993; doi:10.3390/pathogens6030036), 2017-08-09
Supplement: pathogens-06-00036-s001.pdf [file pathogens-06-00036-s001.pdf]

**TABLE S1** Genotype grouping of environmental (CL) and clinical (H) isolates from hospital A as per MLVA-7 profiles and location of isolation (environmental) or acquisition (clinical)

| Genotype<br>(nb of VNTR missing) | Strain ID  | Location    | MS142 | MS211 | MS213 | MS215 | MS216 | MS222 | MS223 |
|----------------------------------|------------|-------------|-------|-------|-------|-------|-------|-------|-------|
| A                                | H517       | -           | 1     | 3     | 5     | 6     | 1     | 1     | 4     |
| A                                | H519       | -           | 1     | 3     | 5     | 6     | 1     | 1     | 4     |
| A(-2)                            | H524       | Nephrology  | 1     | -     | 5     | -     | 1     | 1     | 4     |
| B                                | CL513      | Geriatric   | 1     | 2     | 1     | 2     | 1     | 2     | 4     |
| B                                | H511       | -           | 1     | 2     | 1     | 2     | 1     | 2     | 4     |
| B(-2)                            | H532       | Geriatric   | 1     | -     | 1     | 2     | 1     | 2     | -     |
| C(-1)                            | H501a      | -           | 2     | 2     | 5     | 2     | 1     | -     | 2     |
| C(-1)                            | H503       | -           | 2     | 2     | 5     | 2     | 1     | -     | 2     |
| C(-1)                            | H504       | -           | 2     | 2     | 5     | 2     | 1     | -     | 2     |
| D                                | H514       | -           | 4     | 7     | 5     | 5     | 1     | 4     | 7     |
| D                                | H515       | -           | 4     | 7     | 5     | 5     | 1     | 4     | 7     |
| E                                | CL501      | Oncology    | 4     | 6     | 4     | 1     | 2     | 2     | 2     |
| E                                | CL502      | Oncology    | 4     | 6     | 4     | 1     | 2     | 2     | 2     |
| E                                | CL504      | Oncology    | 4     | 6     | 4     | 1     | 2     | 2     | 2     |
| E                                | CL505      | Oncology    | 4     | 6     | 4     | 1     | 2     | 2     | 2     |
| E                                | CL506b     | Oncology    | 4     | 6     | 4     | 1     | 2     | 2     | 2     |
| E                                | CL507      | Oncology    | 4     | 6     | 4     | 1     | 2     | 2     | 2     |
| E                                | CL508      | Oncology    | 4     | 6     | 4     | 1     | 2     | 2     | 2     |
| E                                | CL528      | Oncology    | 4     | 6     | 4     | 1     | 2     | 2     | 2     |
| E                                | CL529      | Oncology    | 4     | 6     | 4     | 1     | 2     | 2     | 2     |
| E                                | CL534a,b,x | Oncology    | 4     | 6     | 4     | 1     | 2     | 2     | 2     |
| E                                | CL535      | Oncology    | 4     | 6     | 4     | 1     | 2     | 2     | 2     |
| E                                | CL542a,b   | ICU         | 4     | 6     | 4     | 1     | 2     | 2     | 2     |
| E                                | CL545a,b   | Surgery     | 4     | 6     | 4     | 1     | 2     | 2     | 2     |
| E                                | CL547a     | Laundry     | 4     | 6     | 4     | 1     | 2     | 2     | 2     |
| E                                | CL549      | Laundry     | 4     | 6     | 4     | 1     | 2     | 2     | 2     |
| F(-1)                            | CL511      | Geriatric   | 5     | 4     | 5     | 1     | 2     | -     | 2     |
| F(-1)                            | CL512      | Geriatric   | 5     | 4     | 5     | 1     | 2     | -     | 2     |
| F(-1)                            | CL519      | Neonatology | 5     | 4     | 5     | 1     | 2     | -     | 2     |
| F(-1)                            | CL520      | Neonatology | 5     | 4     | 5     | 1     | 2     | -     | 2     |
| F(-1)                            | CL532      | ICU         | 5     | 4     | 5     | 1     | 2     | -     | 2     |
| G                                | CL515      | Geriatric   | 5     | 3     | 5     | 6     | 2     | 4     | 2     |
| G                                | CL516      | Geriatric   | 5     | 3     | 5     | 6     | 2     | 4     | 2     |

**TABLE S1 (continued)**

| Genotype<br>(nb of VNTR<br>missing) | Strain ID | Location    | MS142 | MS211 | MS213 | MS215 | MS216 | MS222 | MS223 |
|-------------------------------------|-----------|-------------|-------|-------|-------|-------|-------|-------|-------|
| H                                   | CL522b    | ICU         | 5     | 4     | 5     | 4     | 2     | 2     | 3     |
| H                                   | CL524     | ICU         | 5     | 4     | 5     | 4     | 2     | 2     | 3     |
| H(-1)                               | CL521b    | ICU         | 5     | 4     | 5     | 4     | 2     | 2     | -     |
| H(-1)                               | CL523b    | ICU         | 5     | 4     | 5     | 4     | 2     | 2     | -     |
| ST01                                | H516      | -           | 1     | 2     | 8     | 2     | 1     | 5     | 3     |
| ST02                                | H520      | Surgery     | 1     | 3     | 5     | 6     | 2     | 4     | 2     |
| ST03(-1)                            | H529      | -           | 1     | 4     | 2     | -     | 1     | 2     | 3     |
| ST04                                | H518      | -           | 1     | 6     | 9     | 3     | 1     | 3     | 3     |
| ST05                                | H507      | -           | 3     | 8     | 5     | 1     | 2     | 1     | 2     |
| ST07(-2)                            | H531      | Surgery     | 3     | -     | 8     | 4     | 2     | 4     | -     |
| ST08                                | H506      | -           | 4     | 6     | 2     | 5     | 2     | 3     | 3     |
| ST09                                | H505      | -           | 4     | 8     | 4     | 1     | 2     | 3     | 5     |
| ST10(-1)                            | CL547b    | Laundry     | 4     | -     | 4     | 1     | 2     | 2     | 3     |
| ST11                                | H527      | Oncology    | 4     | 3     | 3     | 6     | 2     | 3     | 2     |
| ST12                                | H510      | -           | 4     | 4     | 3     | 5     | 2     | 4     | 2     |
| ST13                                | CL517     | Neonatology | 4     | 4     | 5     | 1     | 2     | 4     | 2     |
| ST15(-1)                            | H512      | -           | 4     | 3     | 5     | 1     | 2     | 6     | -     |
| ST16                                | H513      | -           | 4     | 3     | 4     | 4     | 2     | 3     | 2     |
| ST17                                | H502      | -           | 4     | 3     | 4     | 2     | 2     | 2     | 2     |
| ST18                                | H508      | Oncology    | 4     | 2     | 3     | 6     | 2     | 2     | 2     |
| ST19(-1)                            | CL509     | Geriatric   | 2     | 4     | 5     | 1     | 2     | -     | 2     |
| ST20(-1)                            | H509      | -           | 5     | 2     | 5     | 2     | 1     | -     | 2     |
| ST21(-1)                            | CL521c    | ICU         | 5     | 4     | 4     | 4     | 2     | 2     | -     |
| ST22                                | CL527     | Oncology    | 5     | 6     | 4     | 1     | 2     | 2     | 2     |
| ST24(-2)                            | CL514     | Geriatric   | -     | 3     | 5     | 1     | -     | 4     | 2     |
| ST25(-2)                            | H525a,b   | -           | 4     | 5     | -     | -     | 4     | 3     | 2     |
| ST26                                | H522      | Geriatric   | 7     | 7     | 3     | 4     | 1     | 4     | 3     |
| ST27                                | H528      | -           | 7     | 2     | 3     | -     | 1     | 3     | 7     |
| ST28                                | CL521a    | -           | 5     | 4     | 5     | 1     | 0     | 4     | 2     |
| Not classified                      | H521      | -           | 4     | -     | -     | -     | 2     | -     | 2     |
| Not classified                      | H523      | -           | -     | -     | -     | -     | -     | -     | -     |
| Not classified                      | H526      | ICU         | -     | -     | -     | -     | 1     | -     | -     |

**Note: a,b,c,x represent strains isolated from the same swab sample. Results combined in the above table (n=66 strains) but kept separate for the statistical table (Table 2, n=71)**
